# Supplementary material for: Tumor Marker B7-H6 Bound to the Coiled Coil Peptide-Polymer Conjugate Enables Targeted Therapy by Activating Human Natural Killer Cells
Source: MDPI journal article supplement (doi:10.3390/biomedicines9111597), 2021-11-02

## Article

# Tumor Marker B7-H6 Bound to the Coiled Coil Peptide-Polymer Conjugate Enables Targeted Therapy by Activating Human Natural Killer Cells

Barbora Kalousková, Ondřej Skořepa, Denis Cmunť, Celeste Abreu, Kateřina Krejčová, Jan Bláha, Irena Siegllová, Vlastimil Král, Milan Fábry, Robert Pola, Michal Pechar, Ondřej Vaněk

## Supplementary Materials

## Supplementary Methods

## 1. Preparation of PolCC+ Polymer-peptide Conjugate

### 1.1 Materials

Methacryloyl chloride, 1-aminopropan-2-ol, 3-aminopropanoic acid, 4,5-dihydrothiazole-2-thiol, dimethylaminopyridine (DMAP), 1-ethyl-3-(3-dimethylaminopropyl)carbodiimide hydrochloride (EDC), N,N'-dicyclohexylcarbodiimide (DCC), 2,2'-azobis(isobutyronitrile) (AIBN), 4-cyano-4-thiobenzoylsulfanylpentanoic acid, N-(2-aminoethyl)biotinamide hydrobromide (biotin-NH<sub>2</sub>), N,N-dimethylacetamide (DMA), dimethyl sulfoxide (DMSO) and tert-butyl alcohol were purchased from Sigma-Aldrich, MT, USA. 2,2'-Azobis(4-methoxy-2,4-dimethylvaleronitrile) (V-70) was purchased from Wako Chemicals Europe GmbH, Germany. 2-Chlorotriethyl chloride resin and protected amino acid derivatives were purchased from Iris Biotech, GmbH, Germany. [(1R,8S)-9-bicyclo[6.1.0]non-4-ynyl]methyl N-[2-[2-(2-aminoethoxy)ethoxy]ethyl]carbamate (Bcn-Peg<sub>2</sub>-NH<sub>2</sub>) was purchased from SiChem GmbH, Germany. 3-Amino-1-(11,12-didehydridibenzo[b,f]azocin-5(6H)-yl)propan-1-one (Dbco-NH<sub>2</sub>) was purchased from Click Chemistry Tools, AZ, USA. All other reagents and solvents were purchased from Sigma-Aldrich, MT, USA. All chemicals and solvents were of analytical grade.

The contents of thiazolidine-2-thione (TT) groups, dithiobenzoate (DTB) end groups, and aza-dibenzocyclooctyne (Dbco) groups were determined spectrophotometrically on a Helios Alpha UV/VIS spectrophotometer (Thermospectronic, UK) using the following absorption coefficients:  $\epsilon_{TT} = 10300 \text{ L}\cdot\text{mol}^{-1}\cdot\text{cm}^{-1}$  (305 nm, methanol),  $\epsilon_{DTB} = 12100 \text{ L}\cdot\text{mol}^{-1}\cdot\text{cm}^{-1}$  (302 nm, methanol),  $\epsilon_{Dbco} = 13000 \text{ L}\cdot\text{mol}^{-1}\cdot\text{cm}^{-1}$  (292 nm, methanol).

Monitoring of the conjugation reactions of Dbco-NH<sub>2</sub>, Bcn-Peg<sub>2</sub>-NH<sub>2</sub>, biotin-NH<sub>2</sub>, and peptide azide EKE to the reactive polymer precursors was performed by HPLC using a 100 × 4.6 mm Chromolith Performance RP-18e column (Merck, Germany) and a linear gradient of water/acetonitrile (0–100 % acetonitrile) in the presence of 0.1 % TFA with a UV-Vis diode array detector (Shimadzu, Japan).

The determination of the molecular weights and polydispersity of the copolymers was performed by SEC on an HPLC system (Shimadzu, Japan) equipped with UV, differential refractive index, and multi-angle light scattering (LS) DAWN Heleos II (Wyatt Technology Corp., USA) detectors using a TSK 3000 SW<sub>XL</sub> column (Tosoh Bioscience, Japan) (80 % methanol, 20 % 0.3 M acetate buffer pH 6.5) at a flow rate of 0.5 ml/min.

### 1.2 Preparation of Monomers

N-(2-Hydroxypropyl)methacrylamide (HPMA) and 3-methacrylamidopropanoylthiazolidine-2-thione (Ma-AP-TT) were prepared as described in references [86] and [87], respectively.

### 1.3 Preparation of Reactive Polymer Precursor

Copolymer poly(HPMA-co-Ma-AP-TT) (P-TT) was prepared by reversible addition–fragmentation chain transfer (RAFT) copolymerization of HPMA (1.0 g, 6.98 mmol, 90 mol. %) and Ma-AP-TT (200 mg, 0.78 mmol, 10 mol. %) using V70 (9.70  $\mu\text{mol}$ , 2.99 mg) as an azo initiator and (1-cyano-1-methyl-ethyl) benzenecarbodithioate (19.4  $\mu\text{mol}$ , 4.29 mg)

(a)



## References

1. Vesely, M.D.; Kershaw, M.H.; Schreiber, R.D.; Smyth, M.J. Natural Innate and Adaptive Immunity to Cancer. *Annu. Rev. Immunol.* **2011**, *29*, 235–271, <https://doi.org/10.1146/annurev-immunol-031210-101324>.
2. Dunn, G.P.; Bruce, A.T.; Ikeda, H.; Old, L.J.; Schreiber, R.D. Cancer immunoediting: From immunosurveillance to tumor escape. *Nat. Immunol.* **2002**, *3*, 991–998, <https://doi.org/10.1038/ni1102-991>.
3. Smyth, M.J.; Dunn, G.P.; Schreiber, R.D. Cancer Immunosurveillance and Immunoediting: The Roles of Immunity in Suppressing Tumor Development and Shaping Tumor Immunogenicity. *Adv. Immunol.* **2006**, *90*, 1–50, [https://doi.org/10.1016/s0065-2776\(06\)90001-7](https://doi.org/10.1016/s0065-2776(06)90001-7).
4. Aguilar, O.A.; Mesci, A.; Ma, J.; Chen, P.; Kirkham, C.L.; Hundrieser, J.; Voigt, S.; Allan, D.S.; Carlyle, J.R. Modulation of Clr Ligand Expression and NKR-P1 Receptor Function during Murine Cytomegalovirus Infection. *J. Innate Immun.* **2015**, *7*, 584–600, <https://doi.org/10.1159/000382032>.
5. Chen, D.S.; Mellman, I. Elements of cancer immunity and the cancer-immune set point. *Nature* **2017**, *541*, 321–330, <https://doi.org/10.1038/nature21349>.
6. Zitvogel, L.; Tesniere, A.; Kroemer, G. Cancer despite immunosurveillance: Immunoselection and immunosubversion. *Nat. Rev. Immunol.* **2006**, *6*, 715–727, <https://doi.org/10.1038/nri1936>.
7. Liu, Y.; Cao, X. Immunosuppressive cells in tumor immune escape and metastasis. *J. Mol. Med.* **2015**, *94*, 509–522, <https://doi.org/10.1007/s00109-015-1376-x>.
8. Dunn, G.P.; Old, L.J.; Schreiber, R.D. The Three Es of Cancer Immunoediting. *Annu. Rev. Immunol.* **2004**, *22*, 329–360, <https://doi.org/10.1146/annurev.immunol.22.012703.104803>.
9. Pascal, V.; Schleinitz, N.; Brunet, C.; Ravet, S.; Bonnet, E.; Lafarge, X.; Touinssi, M.; Reviron, D.; Viallard, J.F.; Moreau, J.F.; et al. Comparative analysis of NK cell subset distribution in normal and lymphoproliferative disease of granular lymphocyte conditions. *Eur. J. Immunol.* **2004**, *34*, 2930–2940, <https://doi.org/10.1002/eji.200425146>.
10. Bryceson, Y.T.; Björkström, N.K.; Mjösberg, J.; Ljunggren, H. Natural Killer Cells. In *The Autoimmune Diseases*; Elsevier: Amsterdam, The Netherlands, 2020; pp. 229–242.
11. Morvan, M.; Lanier, L.L. NK cells and cancer: You can teach innate cells new tricks. *Nat. Rev. Cancer* **2015**, *16*, 7–19, <https://doi.org/10.1038/nrc.2015.5>.
12. Shimasaki, N.; Jain, A.; Campana, D. NK cells for cancer immunotherapy. *Nat. Rev. Drug Discov.* **2020**, *19*, 200–218, <https://doi.org/10.1038/s41573-019-0052-1>.
13. Hu, W.; Wang, G.; Huang, D.; Sui, M.; Xu, Y. Cancer Immunotherapy Based on Natural Killer Cells: Current Progress and New Opportunities. *Front. Immunol.* **2019**, *10*, 1205, <https://doi.org/10.3389/fimmu.2019.01205>.
14. Habif, G.; Crinier, A.; André, P.; Vivier, E.; Narni-Mancinelli, E. Targeting natural killer cells in solid tumors. *Cell. Mol. Immunol.* **2019**, *16*, 415–422, <https://doi.org/10.1038/s41423-019-0224-2>.
15. Farkona, S.; Diamandis, E.P.; Blasutig, I.M. Cancer immunotherapy: The beginning of the end of cancer? *BMC Med.* **2016**, *14*, 73, <https://doi.org/10.1186/s12916-016-0623-5>.
16. Vivier, E.; Ugolini, S.; Blaise, D.; Chabannon, C.; Brossay, L. Targeting natural killer cells and natural killer T cells in cancer. *Nat. Rev. Immunol.* **2012**, *12*, 239–252, <https://doi.org/10.1038/nri3174>.
17. Chauhan, S.K.S.; Koehl, U.; Kloess, S. Harnessing NK Cell Checkpoint-Modulating Immunotherapies. *Cancers* **2020**, *12*, 1807, <https://doi.org/10.3390/cancers12071807>.
18. Dahlberg, C.I.M.; Sarhan, D.; Chrobok, M.; Duru, A.; Alici, E. Natural Killer Cell-Based Therapies Targeting Cancer: Possible Strategies to Gain and Sustain Anti-Tumor Activity. *Front. Immunol.* **2015**, *6*, 605, <https://doi.org/10.3389/fimmu.2015.00605>.
19. Pfefferle, A.; Huntington, N.D. You Have Got a Fast CAR: Chimeric Antigen Receptor NK Cells in Cancer Therapy. *Cancers* **2020**, *12*, 706, <https://doi.org/10.3390/cancers12030706>.
20. Liu, E.; Marin, D.; Banerjee, P.; Macapinlac, H.A.; Thompson, P.; Basar, R.; Kerbauy, L.N.; Overman, B.; Thall, P.; Kaplan, M.; et al. Use of CAR-Transduced Natural Killer Cells in CD19-Positive Lymphoid Tumors. *New Engl. J. Med.* **2020**, *382*, 545–553, <https://doi.org/10.1056/nejmoa1910607>.
21. Nigro, C.L.; Macagno, M.; Sangiolo, D.; Bertolaccini, L.; Aglietta, M.; Merlano, M.C. NK-mediated antibody-dependent cell-mediated cytotoxicity in solid tumors: Biological evidence and clinical perspectives. *Ann. Transl. Med.* **2019**, *7*, 105–105, <https://doi.org/10.21037/atm.2019.01.42>.
22. Tay, S.S.; Carol, H.; Biro, M. TriKEs and BiKEs join CARs on the cancer immunotherapy highway. *Hum. Vaccines Immunother.* **2016**, *12*, 2790–2796, <https://doi.org/10.1080/21645515.2016.1198455>.
23. Gleason, M.K.; Ross, J.A.; Warlick, E.D.; Lund, T.C.; Verneris, M.R.; Wiernik, A.; Spellman, S.; Haagensohn, M.D.; Lenvik, A.J.; Litzow, M.R.; et al. CD16xCD33 bispecific killer cell engager (BiKE) activates NK cells against primary MDS and MDSC CD33+ targets. *Blood* **2014**, *123*, 3016–3026, <https://doi.org/10.1182/blood-2013-10-533398>.
24. Felices, M.; Lenvik, T.R.; Davis, Z.B.; Miller, J.S.; Valleria, D.A. Generation of BiKEs and TriKEs to Improve NK Cell-Mediated Targeting of Tumor Cells. In *Natural Killer Cells*; Humana Press, New York, NY, USA, 2016; Volume 1441, pp. 333–346, [https://doi.org/10.1007/978-1-4939-3684-7\\_28](https://doi.org/10.1007/978-1-4939-3684-7_28).
25. Sarhan, D.; Brandt, L.; Felices, M.; Guldevall, K.; Lenvik, T.; Hinderlie, P.; Curtsinger, J.; Warlick, E.; Spellman, S.R.; Blazar, B.R.; et al. 161533 TriKE stimulates NK-cell function to overcome myeloid-derived suppressor cells in MDS. *Blood Adv.* **2018**, *2*, 1459–1469, <https://doi.org/10.1182/bloodadvances.2017012369>.

26. Märklin, M.; Hagelstein, I.; Koerner, S.P.; Rothfelder, K.; Pfluegler, M.S.; Schumacher, A.; Grosse-Hovest, L.; Jung, G.; Salih, H.R. Bispecific NKG2D-CD3 and NKG2D-CD16 fusion proteins for induction of NK and T cell reactivity against acute myeloid leukemia. *J. Immunother. Cancer* **2019**, *7*, 143, <https://doi.org/10.1186/s40425-019-0606-0>.
27. Han, Y.; Sun, F.; Zhang, X.; Wang, T.; Jiang, J.; Cai, J.; Gao, Q.; Hezam, K.; Liu, Y.; Xie, J.; et al. CD24 targeting bi-specific antibody that simultaneously stimulates NKG2D enhances the efficacy of cancer immunotherapy. *J. Cancer Res. Clin. Oncol.* **2019**, *145*, 1179–1190, <https://doi.org/10.1007/s00432-019-02865-8>.
28. Chester, C.; Fritsch, K.; Kohrt, H.E. Natural Killer Cell Immunomodulation: Targeting Activating, Inhibitory, and Co-stimulatory Receptor Signaling for Cancer Immunotherapy. *Front. Immunol.* **2015**, *6*, 601, <https://doi.org/10.3389/fimmu.2015.00601>.
29. Koch, J.; Steinle, A.; Watzl, C.; Mandelboim, O. Activating natural cytotoxicity receptors of natural killer cells in cancer and infection. *Trends Immunol.* **2013**, *34*, 182–191, <https://doi.org/10.1016/j.it.2013.01.003>.
30. Memmer, S.; Weil, S.; Beyer, S.; Zöller, T.; Peters, E.; Hartmann, J.; Steinle, A.; Koch, J. The Stalk Domain of NKp30 Contributes to Ligand Binding and Signaling of a Preassembled NKp30-CD3 $\zeta$  Complex. *J. Biol. Chem.* **2016**, *291*, 25427–25438, <https://doi.org/10.1074/jbc.M116.742981>.
31. Brandt, C.S.; Baratin, M.; Yi, E.C.; Kennedy, J.; Gao, Z.; Fox, B.; Haldeman, B.; Ostrander, C.D.; Kaifu, T.; Chabannon, C.; et al. The B7 family member B7-H6 is a tumor cell ligand for the activating natural killer cell receptor NKp30 in humans. *J. Exp. Med.* **2009**, *206*, 1495–1503, <https://doi.org/10.1084/jem.20090681>.
32. Binici, J.; Koch, J. BAG-6, a jack of all trades in health and disease. *Cell. Mol. Life Sci.* **2013**, *71*, 1829–1837, <https://doi.org/10.1007/s00018-013-1522-y>.
33. Kruse, P.H.; Matta, J.; Ugolini, S.; Vivier, E. Natural cytotoxicity receptors and their ligands. *Immunol. Cell Biol.* **2013**, *92*, 221–229, <https://doi.org/10.1038/icb.2013.98>.
34. Wang, W.; Guo, H.; Geng, J.; Zheng, X.; Wei, H.; Sun, R.; Tian, Z. Tumor-released Galectin-3, a Soluble Inhibitory Ligand of Human NKp30, Plays an Important Role in Tumor Escape from NK Cell Attack. *J. Biol. Chem.* **2014**, *289*, 33311–33319, <https://doi.org/10.1074/jbc.M114.603464>.
35. Kaifu, T.; Escalière, B.; Gastinel, L.N.; Vivier, E.; Baratin, M. B7-H6/NKp30 interaction: A mechanism of alerting NK cells against tumors. *Cell. Mol. Life Sci.* **2011**, *68*, 3531–3539, <https://doi.org/10.1007/s00018-011-0802-7>.
36. Li, Y.; Wang, Q.; Mariuzza, R.A. Structure of the human activating natural cytotoxicity receptor NKp30 bound to its tumor cell ligand B7-H6. *J. Exp. Med.* **2011**, *208*, 703–714, <https://doi.org/10.1084/jem.20102548>.
37. Skořepa, O.; Pazicky, S.; Kalousková, B.; Bláha, J.; Abreu, C.; Ječmen, T.; Rosůlek, M.; Fish, A.; Sedivy, A.; Harlos, K.; et al. Natural Killer Cell Activation Receptor NKp30 Oligomerization Depends on Its N-Glycosylation. *Cancers* **2020**, *12*, 1998, <https://doi.org/10.3390/cancers12071998>.
38. Xu, X.; Narni-Mancinelli, E.; Cantoni, C.; Li, Y.; Guia, S.; Gauthier, L.; Chen, Q.; Moretta, A.; Vély, F.; Eisenstein, E.; et al. Structural Insights into the Inhibitory Mechanism of an Antibody against B7-H6, a Stress-Induced Cellular Ligand for the Natural Killer Cell Receptor NKp30. *J. Mol. Biol.* **2016**, *428*, 4457–4466, <https://doi.org/10.1016/j.jmb.2016.09.011>.
39. Arnon, T.I.; Markel, G.; Bar-Ilan, A.; Hanna, J.; Fima, E.; Benchetrit, F.; Galili, R.; Cerwenka, A.; Benharroch, D.; Sion-Vardy, N.; et al. Harnessing Soluble NK Cell Killer Receptors for the Generation of Novel Cancer Immune Therapy. *PLoS ONE* **2008**, *3*, e2150, <https://doi.org/10.1371/journal.pone.0002150>.
40. Kellner, C.; Maurer, T.; Hallack, D.; Repp, R.; Van De Winkel, J.G.J.; Parren, P.W.H.I.; Valerius, T.; Humpe, A.; Gramatzki, M.; Peipp, M.; et al. Mimicking an Induced Self Phenotype by Coating Lymphomas with the NKp30 Ligand B7-H6 Promotes NK Cell Cytotoxicity. *J. Immunol.* **2012**, *189*, 5037–5046, <https://doi.org/10.4049/jimmunol.1201321>.
41. Kellner, C.; Günther, A.; Humpe, A.; Repp, R.; Klausz, K.; Derer, S.; Valerius, T.; Ritgen, M.; Brüggemann, M.; Van De Winkel, J.G.; et al. Enhancing natural killer cell-mediated lysis of lymphoma cells by combining therapeutic antibodies with CD20-specific immunoligands engaging NKG2D or NKp30. *OncolImmunology* **2015**, *5*, e1058459, <https://doi.org/10.1080/2162402x.2015.1058459>.
42. Peipp, M.; Derer, S.; Lohse, S.; Staudinger, M.; Klausz, K.; Valerius, T.; Gramatzki, M.; Kellner, C. HER2-specific immunoligands engaging NKp30 or NKp80 trigger NK-cell-mediated lysis of tumor cells and enhance antibody-dependent cell-mediated cytotoxicity. *Oncotarget* **2015**, *6*, 32075–32088, <https://doi.org/10.18632/oncotarget.5135>.
43. Zhang, T.; Wu, M.-R.; Sentman, C.L. An NKp30-Based Chimeric Antigen Receptor Promotes T Cell Effector Functions and Antitumor Efficacy In Vivo. *J. Immunol.* **2012**, *189*, 2290–2299, <https://doi.org/10.4049/jimmunol.1103495>.
44. Wu, M.-R.; Zhang, T.; Demars, L.R.; Sentman, C.L. B7H6-specific chimeric antigen receptors lead to tumor elimination and host antitumor immunity. *Gene Ther.* **2015**, *22*, 675–684, <https://doi.org/10.1038/gt.2015.29>.
45. Hua, C.K.; Gacerez, A.T.; Sentman, C.L.; Ackerman, M.E. Development of unique cytotoxic chimeric antigen receptors based on human scFv targeting B7H6. *Protein Eng. Des. Sel.* **2017**, *30*, 713–721, <https://doi.org/10.1093/protein/gzx051>.
46. Vaněk, O.; Nálekzová, M.; Kavan, D.; Borovičková, I.; Pompach, P.; Novák, P.; Kumar, V.; Vannucci, L.; Hudeček, J.; Hofbauerová, K.; et al. Soluble recombinant CD69 receptors optimized to have an exceptional physical and chemical stability display prolonged circulation and remain intact in the blood of mice. *FEBS J.* **2008**, *275*, 5589–5606, <https://doi.org/10.1111/j.1742-4658.2008.06683.x>.
47. Kolenko, P.; Skálová, T.; Vaněk, O.; Štěpánková, A.; Dušková, J.; Hašek, J.; Bezouška, K.; Dohnálek, J. The high-resolution structure of the extracellular domain of human CD69 using a novel polymer. *Acta Crystallogr. Sect. F Struct. Biol. Cryst. Commun.* **2009**, *65*, 1258–1260, <https://doi.org/10.1107/S1744309109043152>.

48. Deming, T.J.; Klok, H.-A.; Armes, S.P.; Becker, M.L.; Champion, J.A.; Chen, E.Y.-X.; Heilshorn, S.C.; van Hest, J.C.M.; Irvine, D.J.; Johnson, J.A.; et al. Polymers at the Interface with Biology. *Biomacromolecules* **2018**, *19*, 3151–3162, <https://doi.org/10.1021/acs.biomac.8b01029>.
49. Jo, S.D.; Nam, G.-H.; Kwak, G.; Yang, Y.; Kwon, I.C. Harnessing designed nanoparticles: Current strategies and future perspectives in cancer immunotherapy. *Nano Today* **2017**, *17*, 23–37, <https://doi.org/10.1016/j.nantod.2017.10.008>.
50. Aikins, M.E.; Xu, C.; Moon, J.J. Engineered Nanoparticles for Cancer Vaccination and Immunotherapy. *Accounts Chem. Res.* **2020**, *53*, 2094–2105, <https://doi.org/10.1021/acs.accounts.0c00456>.
51. Thangam, R.; Patel, K.D.; Kang, H.; Paulmurugan, R. Advances in Engineered Polymer Nanoparticle Tracking Platforms towards Cancer Immunotherapy—Current Status and Future Perspectives. *Vaccines* **2021**, *9*, 935, <https://doi.org/10.3390/vaccines9080935>.
52. Janisova, L.; Gruzinov, A.; Zaborova, O.V.; Velychivska, N.; Vaněk, O.; Chytil, P.; Etrych, T.; Janoušková, O.; Zhang, X.; Blanchet, C.; et al. Molecular Mechanisms of the Interactions of N-(2-Hydroxypropyl)methacrylamide Copolymers Designed for Cancer Therapy with Blood Plasma Proteins. *Pharmaceutics* **2020**, *12*, 106, <https://doi.org/10.3390/pharmaceutics12020106>.
53. Apostolovic, B.; Danial, M.; Klok, H.-A. Coiled coils: Attractive protein folding motifs for the fabrication of self-assembled, responsive and bioactive materials. *Chem. Soc. Rev.* **2010**, *39*, 3541–3575, <https://doi.org/10.1039/b914339b>.
54. Utterström, J.; Naeimipour, S.; Selegård, R.; Aili, D. Coiled coil-based therapeutics and drug delivery systems. *Adv. Drug Deliv. Rev.* **2020**, *170*, 26–43, <https://doi.org/10.1016/j.addr.2020.12.012>.
55. Pola, R.; Laga, R.; Ulbrich, K.; Sieglová, I.; Král, V.; Fábry, M.; Kabešová, M.; Kovář, M.; Pechar, M. Polymer Therapeutics with a Coiled Coil Motif Targeted against Murine BCL1 Leukemia. *Biomacromolecules* **2013**, *14*, 881–889, <https://doi.org/10.1021/bm3019592>.
56. Wu, K.; Liu, J.; Johnson, R.N.; Yang, J.; Kopeček, J. Drug-Free Macromolecular Therapeutics: Induction of Apoptosis by Coiled-Coil-Mediated Cross-Linking of Antigens on the Cell Surface. *Angew. Chem. Int. Ed.* **2010**, *49*, 1451–1455, <https://doi.org/10.1002/anie.200906232>.
57. Wu, K.; Yang, J.; Liu, J.; Kopeček, J. Coiled-coil based drug-free macromolecular therapeutics: *In vivo* efficacy. *J. Control. Release* **2012**, *157*, 126–131, <https://doi.org/10.1016/j.jconrel.2011.08.002>.
58. Chu, T.-W.; Yang, J.; Zhang, R.; Sima, M.; Kopeček, J. Cell Surface Self-Assembly of Hybrid Nanoconjugates via Oligonucleotide Hybridization Induces Apoptosis. *ACS Nano* **2014**, *8*, 719–730, <https://doi.org/10.1021/nn4053827>.
59. Chu, T.-W.; Zhang, R.; Yang, J.; Chao, M.P.; Shami, P.J.; Kopeček, J. A Two-Step Pretargeted Nanotherapy for CD20 Cross-linking May Achieve Superior Anti-Lymphoma Efficacy to Rituximab. *Theranostics* **2015**, *5*, 834–846, <https://doi.org/10.7150/thno.12040>.
60. Zhang, L.; Fang, Y.; Yang, J.; Kopeček, J. Drug-free macromolecular therapeutics: Impact of structure on induction of apoptosis in Raji B cells. *J. Control. Release* **2017**, *263*, 139–150, <https://doi.org/10.1016/j.jconrel.2016.12.025>.
61. Zhang, L.; Fang, Y.; Li, L.; Yang, J.; Radford, D.C.; Kopeček, J. Human Serum Albumin-Based Drug-Free Macromolecular Therapeutics: Apoptosis Induction by Coiled-Coil-Mediated Cross-Linking of CD20 Antigens on Lymphoma B Cell Surface. *Macromol. Biosci.* **2018**, *18*, e1800224, <https://doi.org/10.1002/mabi.201800224>.
62. Gambles, M.T.; Li, J.; Wang, J.; Sborov, D.; Yang, J.; Kopeček, J. Crosslinking of CD38 Receptors Triggers Apoptosis of Malignant B Cells. *Molecules* **2021**, *26*, 4658, <https://doi.org/10.3390/molecules26154658>.
63. Pastorekova, S.; Gillies, R.J. The role of carbonic anhydrase IX in cancer development: Links to hypoxia, acidosis, and beyond. *Cancer Metastasis Rev.* **2019**, *38*, 65–77, <https://doi.org/10.1007/s10555-019-09799-0>.
64. Pechar, M.; Pola, R.; Laga, R.; Ulbrich, K.; Bednářová, L.; Maloň, P.; Sieglová, I.; Král, V.; Fábry, M.; Vaněk, O. Coiled Coil Peptides as Universal Linkers for the Attachment of Recombinant Proteins to Polymer Therapeutics. *Biomacromolecules* **2011**, *12*, 3645–3655, <https://doi.org/10.1021/bm200897b>.
65. Kissel, M.; Peschke, P.; Šubr, V.; Ulbrich, K.; Strunz, A.M.; Kühnlein, R.; Debus, J.; Friedrich, E. Detection and cellular localisation of the synthetic soluble macromolecular drug carrier pHPMA. *Eur. J. Nucl. Med. Mol. Imaging* **2002**, *29*, 1055–1062, <https://doi.org/10.1007/s00259-002-0835-0>.
66. Aricescu, A.R.; Lu, W.; Jones, E.Y. A time- and cost-efficient system for high-level protein production in mammalian cells. *Acta Crystallogr. Sect. D Biol. Crystallogr.* **2006**, *62*, 1243–1250, <https://doi.org/10.1107/s0907444906029799>.
67. Vaněk, O.; Celadova, P.; Skořepa, O.; Bláha, J.; Kalousková, B.; Dvorská, A.; Poláchová, E.; Pucholtová, H.; Kavan, D.; Pompach, P.; et al. Production of recombinant soluble dimeric C-type lectin-like receptors of rat natural killer cells. *Sci. Rep.* **2019**, *9*, 17836, <https://doi.org/10.1038/s41598-019-52114-8>.
68. Csaderova, L.; Debreova, M.; Radvak, P.; Stano, M.; Vrestiakova, M.; Kopacek, J.; Pastorekova, S.; Svastova, E. The effect of carbonic anhydrase IX on focal contacts during cell spreading and migration. *Front. Physiol.* **2013**, *4*, 271, <https://doi.org/10.3389/fphys.2013.00271>.
69. Bláha, J.; Páchl, P.; Novák, P.; Vaněk, O. Expression and purification of soluble and stable ectodomain of natural killer cell receptor LLT1 through high-density transfection of suspension adapted HEK293S GnTI<sup>−</sup> cells. *Protein Expr. Purif.* **2015**, *109*, 7–13, <https://doi.org/10.1016/j.pep.2015.01.006>.
70. Durocher, Y. High-level and high-throughput recombinant protein production by transient transfection of suspension-growing human 293-EBNA1 cells. *Nucleic Acids Res.* **2002**, *30*, E9, <https://doi.org/10.1093/nar/30.2.e9>.
71. Pekar, L.; Klausz, K.; Busch, M.; Valldorf, B.; Kolmar, H.; Wesch, D.; Oberg, H.-H.; Krohn, S.; Boje, A.S.; Gehlert, C.L.; et al. Affinity Maturation of B7-H6 Translates into Enhanced NK Cell-Mediated Tumor Cell Lysis and Improved Proinflammatory



- Cytokine Release of Bispecific Immunoligands via NKp30 Engagement. *J. Immunol.* **2020**, *206*, 225–236, <https://doi.org/10.4049/jimmunol.2001004>.
72. Scheuermann, T.H.; Brautigam, C.A. High-precision, automated integration of multiple isothermal titration calorimetric thermograms: New features of NITPIC. *Methods* **2014**, *76*, 87–98, <https://doi.org/10.1016/j.ymeth.2014.11.024>.
73. Zhao, H.; Piszczek, G.; Schuck, P. SEDPHAT—A platform for global ITC analysis and global multi-method analysis of molecular interactions. *Methods* **2015**, *76*, 137–148, <https://doi.org/10.1016/j.ymeth.2014.11.012>.
74. Brautigam, C.A. Calculations and Publication-Quality Illustrations for Analytical Ultracentrifugation Data. *Methods Enzym.* **2015**, *562*, 109–133, <https://doi.org/10.1016/bs.mie.2015.05.001>.
75. Rozbeský, D.; Kavan, D.; Chmelík, J.; Novák, P.; Vaněk, O.; Bezouška, K. High-level expression of soluble form of mouse natural killer cell receptor NKR-P1C(B6) in *Escherichia coli*. *Protein Expr. Purif.* **2011**, *77*, 178–184, <https://doi.org/10.1016/j.pep.2011.01.013>.
76. Schuck, P. Size-Distribution Analysis of Macromolecules by Sedimentation Velocity Ultracentrifugation and Lamm Equation Modeling. *Biophys. J.* **2000**, *78*, 1606–1619, [https://doi.org/10.1016/s0006-3495\(00\)76713-0](https://doi.org/10.1016/s0006-3495(00)76713-0).
77. Skálová, T.; Kotýnková, K.; Dušková, J.; Hašek, J.; Koval', T.; Kolenko, P.; Novák, P.; Man, P.; Hanč, P.; Vaněk, O.; et al. Mouse Clr-g, a Ligand for NK Cell Activation Receptor NKR-P1F: Crystal Structure and Biophysical Properties. *J. Immunol.* **2012**, *189*, 4881–4889, <https://doi.org/10.4049/jimmunol.1200880>.
78. Skálová, T.; Bláha, J.; Harlos, K.; Dušková, J.; Koval', T.; Stránský, J.; Hašek, J.; Vaněk, O.; Dohnálek, J. Four crystal structures of human LLT1, a ligand of human NKR-P1, in varied glycosylation and oligomerization states. *Acta Crystallogr. Sect. D Biol. Crystallogr.* **2015**, *71*, 578–591, <https://doi.org/10.1107/S1399004714027928>.
79. Joyce, M.G.; Tran, P.; Zhuravleva, M.A.; Jaw, J.; Colonna, M.; Sun, P.D. Crystal structure of human natural cytotoxicity receptor NKp30 and identification of its ligand binding site. *Proc. Natl. Acad. Sci. USA* **2011**, *108*, 6223–6228, <https://doi.org/10.1073/pnas.1100622108>.
80. Bláha, J.; Kalousková, B.; Skořepa, O.; Pažický, S.; Novák, P.; Vaněk, O. High-level expression and purification of soluble form of human natural killer cell receptor NKR-P1 in HEK293S GnTI<sup>−</sup> Cells. *Protein Expr. Purif.* **2017**, *140*, 36–43, <https://doi.org/10.1016/j.pep.2017.07.016>.
81. Herrmann, J.; Berberich, H.; Hartmann, J.; Beyer, S.; Davies, K.; Koch, J. Homo-oligomerization of the Activating Natural Killer Cell Receptor NKp30 Ectodomain Increases Its Binding Affinity for Cellular Ligands. *J. Biol. Chem.* **2014**, *289*, 765–777, <https://doi.org/10.1074/jbc.m113.514786>.
82. Pechar, M.; Pola, R.; Laga, R.; Braunova, A.; Filippov, S.K.; Bogomolova, A.; Bednarova, L.; Vanek, O.; Ulbrich, K. Coiled coil peptides and polymer-peptide conjugates: Synthesis, self-assembly, characterization and potential in drug delivery systems. *Biomacromolecules* **2014**, *15*, 2590–2599, <https://doi.org/10.1021/bm500436p>.
83. Matta, J.; Baratin, M.; Chiche, L.; Forel, J.M.; Cognet, C.; Thomas, G.; Farnarier, C.; Piperoglou, C.; Papazian, L.; Chaussabel, D.; et al. Induction of B7-H6, a ligand for the natural killer cell-activating receptor NKp30, in inflammatory conditions. *Blood* **2013**, *122*, 394–404, <https://doi.org/10.1182/blood-2013-01-481705>.
84. Wykoff, C.C.; Beasley, N.J.; Watson, P.; Turner, K.J.; Pastorek, J.; Sibtain, A.; Wilson, G.; Turley, H.; Talks, K.L.; Maxwell, P.; et al. Hypoxia-inducible expression of tumor-associated carbonic anhydrases. *Cancer Res.* **2000**, *60*, 7075–7083.
85. Sowa, T.; Menju, T.; Chen-Yoshikawa, T.F.; Takahashi, K.; Nishikawa, S.; Nakanishi, T.; Shikuma, K.; Motoyama, H.; Hijiya, K.; Aoyama, A.; et al. Hypoxia-inducible factor 1 promotes chemoresistance of lung cancer by inducing carbonic anhydrase IX expression. *Cancer Med.* **2016**, *6*, 288–297, <https://doi.org/10.1002/cam4.991>.
86. Ulbrich, K.; Šubr, V.; Strohal, J.; Plocová, D.; Jelínková, M.; Říhová, B. Polymeric Drugs Based on Conjugates of Synthetic and Natural Macromolecules. I. Synthesis and Physico-Chemical Characterisation. *J. Control. Release* **2000**, *64*, 63–79, [https://doi.org/10.1016/s0168-3659\(99\)00141-8](https://doi.org/10.1016/s0168-3659(99)00141-8).
87. Pola, R.; Král, V.; Filippov, S.K.; Kabarov, L.; Etrych, T.; Siegllová, I.; Sedláček, J.; Fábry, M.; Pechar, M. Polymer Cancerostatics Targeted by Recombinant Antibody Fragments to Gd2-Positive Tumor Cells. *Biomacromolecules* **2019**, *20*, 412–421, <https://doi.org/10.1021/acs.biomac.8b01616>.
88. Perrier, S.; Takolpuckdee, P.; Westwood, J.; Lewis, D.M. Versatile Chain Transfer Agents for Reversible Addition Fragmentation Chain Transfer (RAFT) Polymerization to Synthesize Functional Polymeric Architectures. *Macromolecules* **2004**, *37*, 2709–2717, <https://doi.org/10.1021/ma035468b>.
89. Green, N.M. A Spectrophotometric Assay for Avidin and Biotin Based on Binding of Dyes by Avidin. *Biochem. J.* **1965**, *94*, 23C–24C, <https://doi.org/10.1042/bj0940023c>.
90. Wood, C.W.; Woolfson, D.N. CCBUILDER 2.0: Powerful and accessible coiled-coil modeling. *Protein Sci.* **2018**, *27*, 103–111, <https://doi.org/10.1002/pro.3279>.

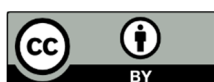

Supplement: s1 [file s1]
